# Supplementary material
Source: publisher figshare collection journal article supplement (https://gsajournals.figshare.com/ndownloader/files/19828100)

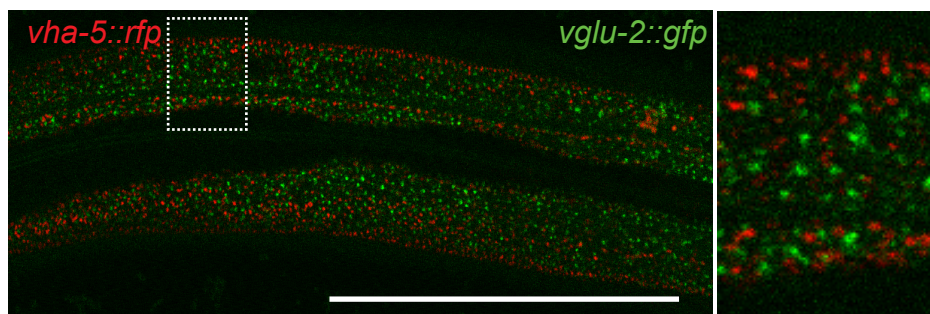

Supp. Figure S1

Supplement: Supplementary file 1 [file 19828100]
